# Supplementary material for: Speech and Burden of Secondary Surgical Interventions Following One-Stage Repair of Unilateral Cleft Lip and Palate and Alveolar Bone Grafting Performed at Different Timings
Source: MDPI journal article supplement (doi:10.3390/jcm12175545), 2023-08-25
Supplement: s1 [file s1]

**Supplementary Table S1.** Pairwise correlations

|           | intel            | hyper            | hypo | grimacing        | v_abnor | mis_inter    | mis_ad          | retr            | mis_r           | fist_y_n | fist_clos       | phar            | No_oper         | sex | age_rep         | age_abg         | age_spe |
|-----------|------------------|------------------|------|------------------|---------|--------------|-----------------|-----------------|-----------------|----------|-----------------|-----------------|-----------------|-----|-----------------|-----------------|---------|
| intel     | x                | 0.84<br>(<0.001) |      | 0.5<br>(<0.001)  |         |              |                 | 0.28<br>(0.037) | 0.38<br>(0.004) |          |                 | 0.33<br>(0.012) |                 |     |                 |                 |         |
| hyper     | 0.84<br>(<0.001) | x                |      | 0.49<br>(<0.001) |         |              |                 | 0.35<br>(0.009) |                 |          |                 | 0.39<br>(0.003) |                 |     |                 |                 |         |
| hypo      |                  |                  | x    |                  |         |              |                 |                 |                 |          |                 |                 |                 |     |                 |                 |         |
| grimacing | 0.5 (<0.001)     | 0.49<br>(<0.001) |      | x                |         |              | 0.33<br>(0.012) |                 |                 |          |                 |                 |                 |     |                 |                 |         |
| v_abnor   |                  |                  |      |                  | x       |              |                 |                 |                 |          |                 |                 |                 |     |                 |                 |         |
| mis_inter |                  |                  |      |                  |         | x            | 0.39<br>(0.003) |                 |                 |          |                 |                 |                 |     |                 |                 |         |
| mis_ad    |                  |                  |      | 0.33<br>(0.012)  |         | 0.39 (0.003) | x               |                 |                 |          |                 |                 |                 |     |                 |                 |         |
| retr      | 0.28 (0.037)     | 0.35<br>(0.009)  |      |                  |         |              |                 | x               |                 |          | 0.30<br>(0.027) |                 |                 |     |                 |                 |         |
| mis_r     | 0.38 (0.004)     |                  |      |                  |         |              |                 |                 | x               |          |                 |                 |                 |     |                 |                 |         |
| fist_y_n  |                  |                  |      |                  |         |              |                 |                 |                 | x        |                 |                 |                 |     |                 |                 |         |
| fist_clos |                  |                  |      |                  |         |              |                 | 0.30<br>(0.027) |                 |          | x               |                 | 0.37<br>(0.005) |     |                 |                 |         |
| phar      | 0.33 (0.012)     | 0.39<br>(0.003)  |      |                  |         |              |                 |                 |                 |          |                 | x               |                 |     |                 |                 |         |
| No_oper   |                  |                  |      |                  |         |              |                 |                 |                 |          | 0.37<br>(0.005) |                 | x               |     |                 |                 |         |
| sex       |                  |                  |      |                  |         |              |                 |                 |                 |          |                 |                 |                 | x   |                 |                 |         |
| age_rep   |                  |                  |      |                  |         |              |                 |                 |                 |          |                 |                 |                 |     | x               | 0.40<br>(0.002) |         |
| age_abg   |                  |                  |      |                  |         |              |                 |                 |                 |          |                 |                 |                 |     | 0.40<br>(0.002) | x               |         |
| age_spe   |                  |                  |      |                  |         |              |                 |                 |                 |          |                 |                 |                 |     |                 |                 | x       |

Intel—intelligibility; hyper—hypernasality; hypo—hyponasality; grimacing—facial grimacing; v\_abnor—voice abnormalities; mis\_inter—misarticulated interdental sounds; mis\_ad—misarticulated addental sounds; retr—retracted sounds; mis\_r—misarticulated “r” sounds; fist\_y\_n— fistula presence, yes/no; fist\_clos—fistula closure, yes/no; phar—pharyngoplasty performed, yes/no; No\_oper—number of primary and secondary operations; age\_rep—age at cleft repair; age\_abg—age at alveolar bone grafting; age\_spe—age at speech assessment.

**Supplementary Table S2.** Regression models

| Independent variables                                        | Odds ratio | SE        | P value | 95% CI<br>lower limit | 95% CI<br>upper limit | Summary of the model                                 |
|--------------------------------------------------------------|------------|-----------|---------|-----------------------|-----------------------|------------------------------------------------------|
| Dependent variable: <b>hyponasality</b>                      |            |           |         |                       |                       |                                                      |
| Age at primary repair (months)                               | 0.89       | 0.19      | 0.59    | 0.58                  | 1.37                  | N = 54<br>P = 0.162<br>Pseudo-R <sup>2</sup> = 0.19  |
| Age at alveolar bone grafting                                | 1.04       | 0.17      | 0.82    | 0.75                  | 1.43                  |                                                      |
| Age at assessment                                            | 8.78       | 10.81     | 0.08    | 0.78                  | 98.17                 |                                                      |
| Pharyngoplasty (yes/no)                                      | 1.00       | (omitted) |         |                       |                       |                                                      |
| Fistula closure (yes/no)                                     | 15.05      | 20.30     | 0.04    | 1.07                  | 211.46                |                                                      |
| Fistula presence (yes/no)                                    | 14.93      | 24.85     | 0.10    | 0.57                  | 389.56                |                                                      |
| Dependent variable: <b>voice abnormalities</b>               |            |           |         |                       |                       |                                                      |
| Age at primary repair (months)                               | 1.45       | 0.28      | 0.06    | 0.99                  | 2.11                  | N = 56<br>P = 0.345<br>Pseudo-R <sup>2</sup> = 0.137 |
| Age at alveolar bone grafting                                | 0.77       | 0.13      | 0.11    | 0.56                  | 1.06                  |                                                      |
| Age at assessment                                            | 0.94       | 0.76      | 0.94    | 0.19                  | 4.57                  |                                                      |
| Pharyngoplasty (yes/no)                                      | 3.64       | 5.46      | 0.39    | 0.19                  | 68.66                 |                                                      |
| Fistula closure (yes/no)                                     | 1.17       | 1.66      | 0.91    | 0.07                  | 18.87                 |                                                      |
| Fistula presence (yes/no)                                    | 2.72       | 3.65      | 0.46    | 0.20                  | 37.84                 |                                                      |
| Dependent variable: <b>misarticulated interdental sounds</b> |            |           |         |                       |                       |                                                      |
| Age at primary repair (months)                               | 0.97       | 0.15      | 0.83    | 0.71                  | 1.31                  | N = 49<br>P = 0.985<br>Pseudo-R <sup>2</sup> = 0.006 |
| Age at alveolar bone grafting                                | 1.06       | 0.11      | 0.60    | 0.86                  | 1.29                  |                                                      |
| Age at assessment                                            | 0.98       | 0.59      | 0.97    | 0.30                  | 3.16                  |                                                      |
| Pharyngoplasty (yes/no)                                      | 1.00       | (omitted) |         |                       |                       |                                                      |
| Fistula closure (yes/no)                                     | 1.00       | (omitted) |         |                       |                       |                                                      |
| Fistula presence (yes/no)                                    | 0.74       | 0.92      | 0.81    | 0.07                  | 8.35                  |                                                      |
| Dependent variable: <b>misarticulated addental sounds</b>    |            |           |         |                       |                       |                                                      |
| Age at primary repair (months)                               | 0.65       | 0.28      | 0.32    | 0.27                  | 1.53                  | N = 45<br>P = 0.559<br>Pseudo-R <sup>2</sup> = 0.093 |
| Age at alveolar bone grafting                                | 1.25       | 0.24      | 0.25    | 0.86                  | 1.83                  |                                                      |
| Age at assessment                                            | 1.42       | 1.71      | 0.77    | 0.13                  | 15.10                 |                                                      |
| Pharyngoplasty (yes/no)                                      | 1.00       | (omitted) |         |                       |                       |                                                      |
| Fistula closure (yes/no)                                     | 1.00       | (omitted) |         |                       |                       |                                                      |
| Fistula presence (yes/no)                                    | 1.00       | (omitted) |         |                       |                       |                                                      |
| Dependent variable: <b>retracted sounds</b>                  |            |           |         |                       |                       |                                                      |
| Age at primary repair (months)                               | 0.99       | 0.21      | 0.98    | 0.65                  | 1.52                  | N = 54<br>P = 0.386                                  |
| Age at alveolar bone grafting                                | 1.06       | 0.17      | 0.72    | 0.77                  | 1.46                  |                                                      |

|                                                      |       |           |      |      |        |                                                      |
|------------------------------------------------------|-------|-----------|------|------|--------|------------------------------------------------------|
| Age at assessment                                    | 2.55  | 2.93      | 0.41 | 0.27 | 24.14  | Pseudo-R <sup>2</sup> = 0.14                         |
| Pharyngoplasty (yes/no)                              | 1.00  | (omitted) |      |      |        |                                                      |
| Fistula closure (yes/no)                             | 13.43 | 16.69     | 0.04 | 1.17 | 153.52 |                                                      |
| Fistula presence (yes/no)                            | 8.51  | 13.10     | 0.16 | 0.42 | 174.10 |                                                      |
| Dependent variable: <b>misarticulated “r” sounds</b> |       |           |      |      |        |                                                      |
| Age at primary repair (months)                       | 1.11  | 0.21      | 0.59 | 0.76 | 1.61   | N = 47<br>P = 0.529<br>Pseudo-R <sup>2</sup> = 0.062 |
| Age at alveolar bone grafting                        | 0.82  | 0.11      | 0.15 | 0.63 | 1.07   |                                                      |
| Age at assessment                                    | 0.87  | 0.56      | 0.83 | 0.24 | 3.10   |                                                      |
| Pharyngoplasty (yes/no)                              | 2.59  | 3.89      | 0.53 | 0.14 | 49.02  |                                                      |
| Fistula closure (yes/no)                             | 1.00  | (omitted) |      |      |        |                                                      |
| Fistula presence (yes/no)                            | 1.00  | (omitted) |      |      |        |                                                      |
